# Supplementary material for: Connective Tissue Growth Factor in Digestive System Cancers: A Review and Meta‐Analysis
Source: Hindawi journal article supplement (doi:10.1155/2020/8489093), 2020-01-01
Supplement: f1 [file 8489093.f1.pdf]

## Supplementary materials

**Suppl Table 1.** Association between CTGF expression and clinico-pathological features of cancers

| Characteristics     | Tumor size (cm) (large vs. small) |     |    |     | Lymph node metastasis (positive vs. negative) |    |    |    | Differentiation (poor vs. well, moderate) |    |     |     | TNM Stage (III +IV vs. I + II) |    |    |     | Tumor Number (multiple vs. single) |     |    |     | Vascular Invasion (present vs. absent) |     |     |     | Capsule Formation (present vs. absent) |    |     |     |    |    |    |    |
|---------------------|-----------------------------------|-----|----|-----|-----------------------------------------------|----|----|----|-------------------------------------------|----|-----|-----|--------------------------------|----|----|-----|------------------------------------|-----|----|-----|----------------------------------------|-----|-----|-----|----------------------------------------|----|-----|-----|----|----|----|----|
|                     | a1                                | a0  | b1 | b0  | a1                                            | a0 | b1 | b0 | a1                                        | a0 | b1  | b0  | a1                             | a0 | b1 | b0  | a1                                 | a0  | b1 | b0  | a1                                     | a0  | b1  | b0  | a1                                     | a0 | b1  | b0  |    |    |    |    |
| Study ID            | a1                                | a0  | b1 | b0  | a1                                            | a0 | b1 | b0 | a1                                        | a0 | b1  | b0  | a1                             | a0 | b1 | b0  | a1                                 | a0  | b1 | b0  | a1                                     | a0  | b1  | b0  | a1                                     | a0 | b1  | b0  | a1 | a0 | b1 | b0 |
| Kang 2018           | -                                 | -   | -  | -   | 105                                           | 15 | 19 | 6  | 64                                        | 56 | 16  | 9   | 93                             | 27 | 14 | 11  | -                                  | -   | -  | -   | -                                      | -   | -   | -   | -                                      | -  | -   | -   | -  | -  | -  | -  |
| Jia 2017            | 42                                | 137 | 38 | 157 | -                                             | -  | -  | -  | -                                         | -  | -   | -   | -                              | -  | -  | -   | 13                                 | 166 | 5  | 190 | 62                                     | 117 | 48  | 147 | 93                                     | 86 | 80  | 115 |    |    |    |    |
| Lin 2005            | -                                 | -   | -  | -   | 26                                            | 40 | 31 | 22 | 4                                         | 62 | 3   | 49  | 32                             | 34 | 36 | 17  | -                                  | -   | -  | -   | -                                      | -   | -   | -   | -                                      | -  | -   | -   |    |    |    |    |
| Kim 2014 (cohort 1) | 12                                | 36  | 52 | 214 | -                                             | -  | -  | -  | 29                                        | 19 | 130 | 136 | 5                              | 43 | 12 | 254 | 11                                 | 37  | 41 | 225 | 29                                     | 19  | 150 | 116 | 35                                     | 13 | 225 | 41  |    |    |    |    |
| Kim 2014 (cohort 2) | 10                                | 7   | 6  | 19  |                                               |    |    |    | 10                                        | 7  | 11  | 14  | 2                              | 15 | 1  | 24  | 3                                  | 14  | 1  | 24  | 13                                     | 4   | 17  | 8   | 15                                     | 2  | 25  | 0   |    |    |    |    |
| Liu 2009            | 33                                | 25  | 33 | 31  | 48                                            | 10 | 42 | 22 | 26                                        | 32 | 45  | 19  | 42                             | 16 | 38 | 26  | -                                  | -   | -  | -   | -                                      | -   | -   | -   | -                                      | -  | -   | -   |    |    |    |    |
| Mao 2010            | 29                                | 10  | 23 | 11  | 31                                            | 8  | 18 | 16 | 29                                        | 10 | 15  | 19  | 25                             | 14 | 18 | 16  | -                                  | -   | -  | -   | -                                      | -   | -   | -   | -                                      | -  | -   | -   |    |    |    |    |
| Lin 2011            | -                                 | -   | -  | -   | 29                                            | 32 | 51 | 24 | 5                                         | 56 | 21  | 54  | 34                             | 27 | 55 | 20  | -                                  | -   | -  | -   | -                                      | -   | -   | -   | -                                      | -  | -   | -   |    |    |    |    |
| Gardini 2005        | -                                 | -   | -  | -   | -                                             | -  | -  | -  | 20                                        | 13 | 13  | 9   | -                              | -  | -  | -   | -                                  | -   | -  | -   | -                                      | -   | -   | -   | -                                      | -  | -   | -   |    |    |    |    |
| Zhou 2009           | -                                 | -   | -  | -   | 18                                            | 21 | 14 | 27 | 4                                         | 35 | 4   | 37  | 20                             | 19 | 15 | 26  | -                                  | -   | -  | -   | -                                      | -   | -   | -   | -                                      | -  | -   | -   |    |    |    |    |

a1, a0 (ref): CTGF overexpression; b1, b0 (ref): normal/low expression of CTGF.

**a**

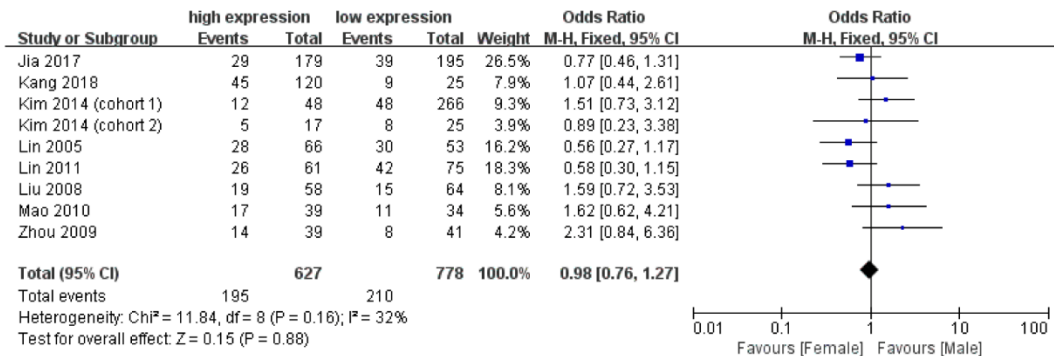

**b**

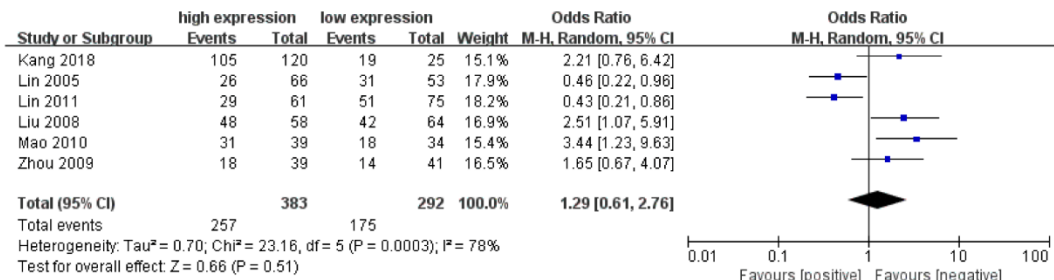

**c**

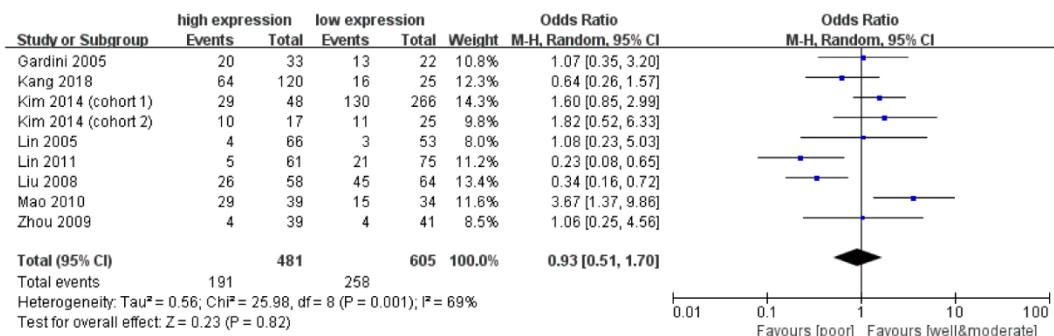

**d**

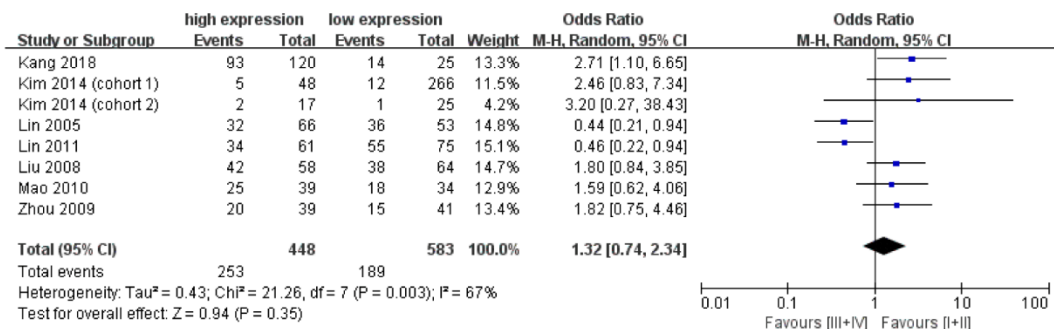

**Suppl. Figure 1**

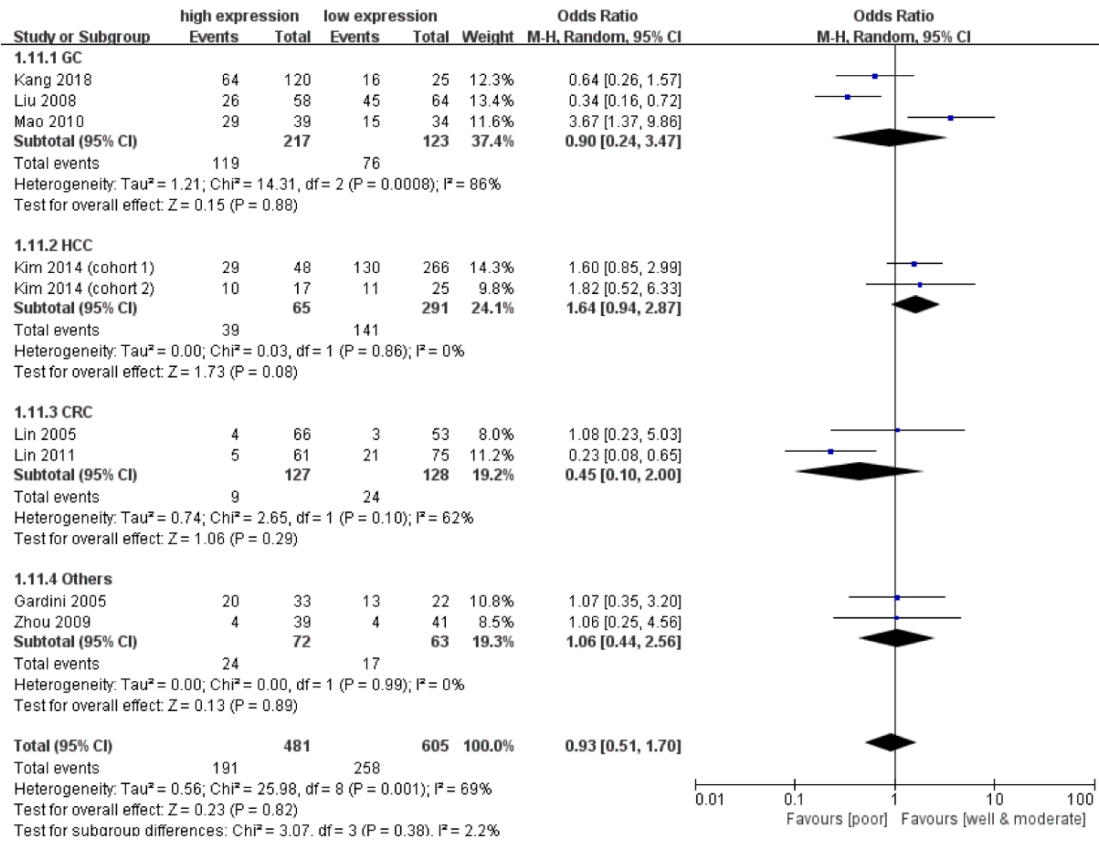

Suppl. Figure 2

**a**

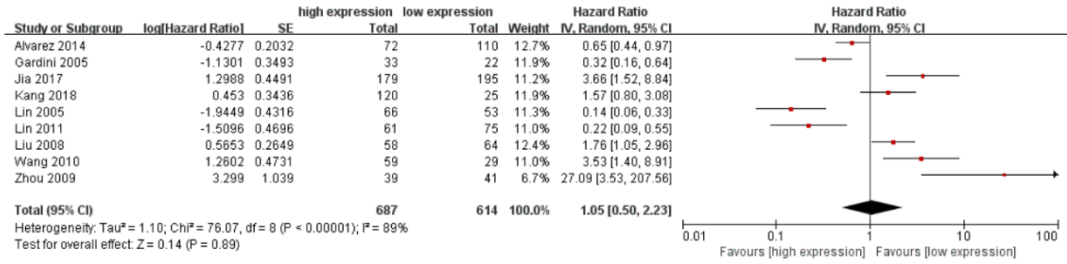

**b**

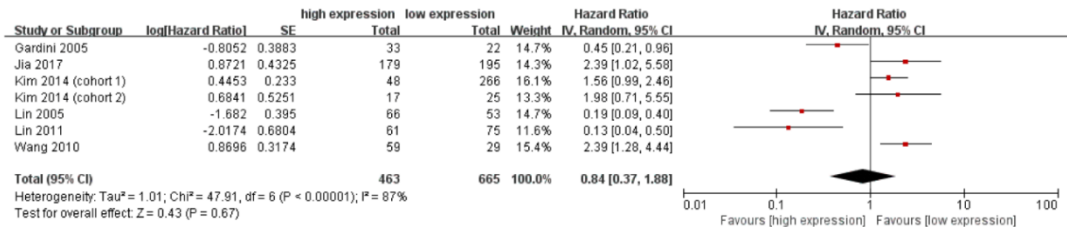

**Suppl. Figure 3**

**a**

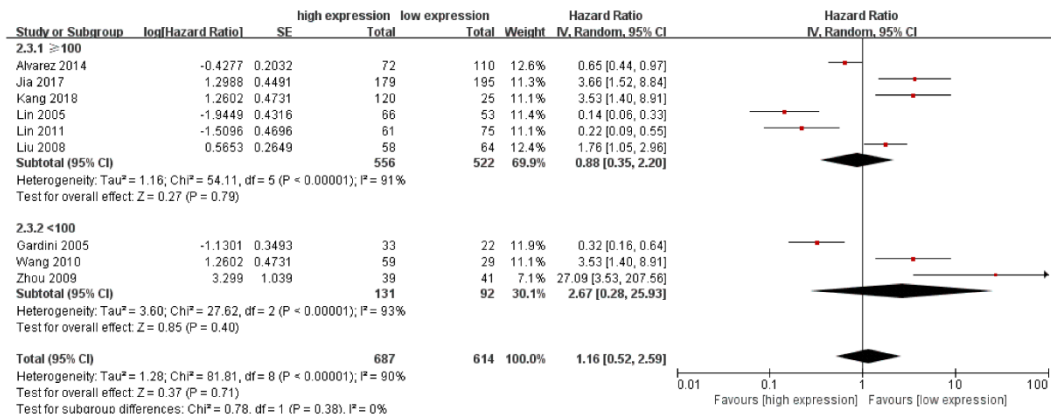

**b**

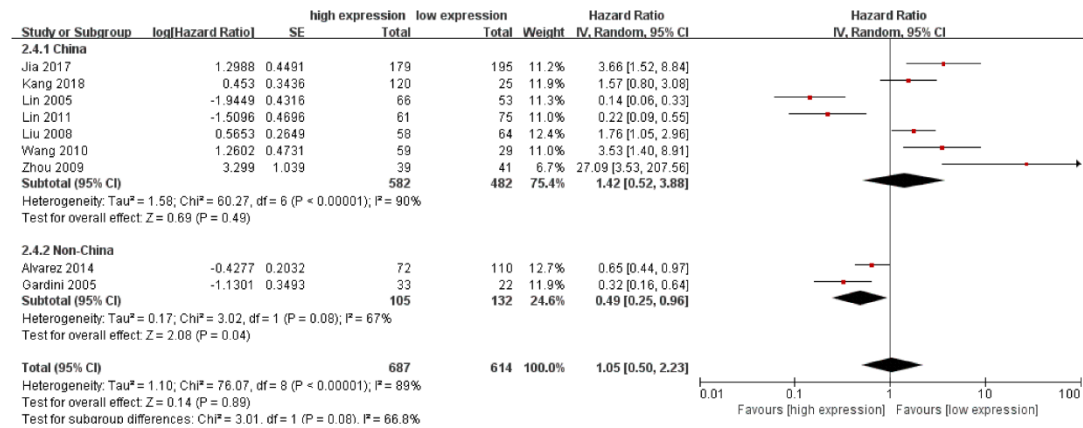

**c**

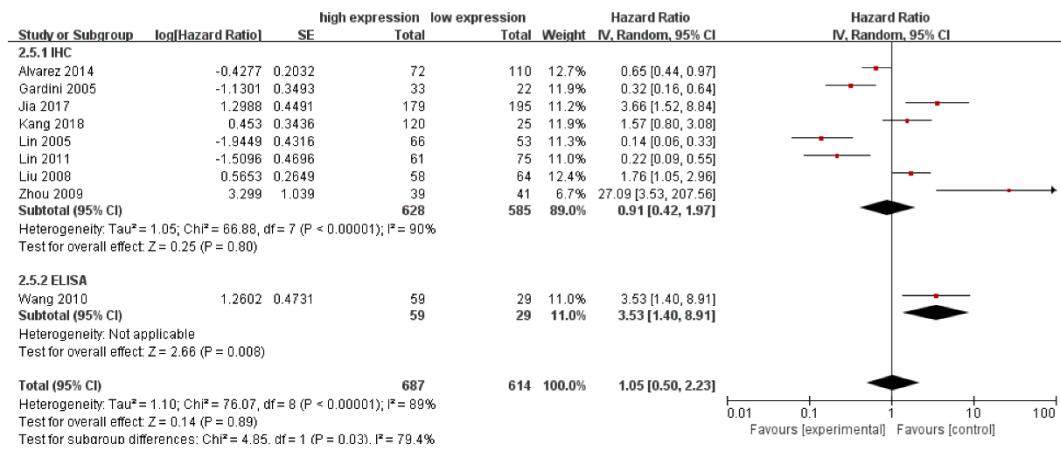

**Suppl. Figure 4**
